# Supplementary material for: Pharmacological therapies for opioid induced constipation in adults with cancer
Source: HighWire-hosted journal article supplement (doi:10.1136/bmj.j3313), 2017-08-02
Supplement: bolj035103.wi.pdf [file bolj035103.wi.pdf]

## Visual summary

# Managing opioid-induced constipation

Constipation affects many patients using opioids to relieve pain associated with advanced cancer or terminal disease.

Constipation is often multifactorial in such patients, and opioids may be one of several causes. As well as direct treatment of the constipation, adjusting medication regimens and treating exacerbating factors may help to provide relief from bowel transit symptoms.

## ADDRESS EXACERBATING FACTORS

### Drugs

5HT<sub>3</sub> antagonists    Anticholinergics    Opioids  
Antipsychotics    Diuretics    Iron  
Calcium supplements    Calcium channel blockers

### Chemotherapies

Thalidomide    Vinca alkaloids  
Busulfan    Carboplatin

### Nutritional and metabolic issues

Dehydration    Reduced food and fluids intake  
Poor diet    Hypothyroidism

**Hypercalcaemia**  
especially in patients with bone metastasis

### Pain on defecation

Anal fissure

### Structural problems

Radiation fibrosis    Bowel obstruction  
Adhesions

### Neurological problems

Neuromuscular problems    Spinal cord compression  
Autonomic neuropathy  
such as due to diabetes or chemotherapy

### Social issues

Reduced mobility    Lack of privacy  
Use of a communal toilet, commode, or bed pan

## MODIFY PAIN RELIEF

Is the current dose of opioid needed to control pain?

Could pain be relieved in other ways?

Non-opioid analgesics    Interventional pain management

Could an opioid with less constipating effect be used?

Buprenorphine    Transdermal fentanyl

Is a referral to other specialists needed?

Palliative care    Neuro-gastroenterology    Pain clinic

## DIRECTLY TREAT CONSTIPATION

### Non-pharmacological options

Increase fluid consumption    Increase dietary fibres  
Increase physical activity (within patients' capabilities)  
Privacy and comfort during defecation  
Complementary therapy

**Positioning on toilet (to relax the puborectalis muscle)**  
knees higher than hips, leaning forward  
with elbows on knees, straightened spine

**Manual removal**  
if the constipation is severe and refractory to other therapies

### Pharmacological management

#### Oral laxatives

**Stool softeners** such as docusate  
**Stimulant laxatives** such as bisacodyl, senna  
**Osmotic laxatives**  
such as macrogol (polyethylene glycol), lactulose

#### Rectal laxatives

**Lubricants** such as glycerin suppositories  
**Stimulant laxatives** such as bisacodyl suppositories  
**Enemas** such as phosphate enema

#### Peripherally acting $\mu$ -opioid receptor antagonists

**Methylnaltrexone bromide**  
**Prolonged release oxycodone in fixed dose combination with Naloxone**  
**Naloxegol oxalate**
